# Supplementary material
Source: PubMed Central journal article supplement (PMC6990946)
Supplement: jamacardiol-5-282-s001.pdf [file jamacardiol-5-282-s001.pdf]

## Supplementary Online Content

van Rosendaal AR, Narula J, Lin FY, et al. Association of high-density calcified 1K plaque with risk of acute coronary syndrome. *JAMA Cardiol*. Published online January 22, 2020. doi:10.1001/jamacardio.2019.5315

**eTable 1.** Per-Patient Calcification Density Data Restricted to Myocardial Infarction Cases

**eTable 2.** Per-Patient Calcification Density Data for Age >75

**eTable 3.** Lesion Specific Calcification Volumes for Culprit Precursors Versus Control Lesions

**eTable 4.** Lesion Specific Calcification Volumes for Culprit Precursors of Myocardial Infarction Versus Control Lesions

**eTable 5.** Plaque Composition in Individuals With a Large 1K Plaque Volume

This supplementary material has been provided by the authors to give readers additional information about their work.

**eTable 1. Per-Patient Calcification Density Data Restricted to Myocardial Infarction Cases**

|                                                 | <b>Myocardial<br/>infarction<br/>N = 126</b> | <b>Control<br/>N = 126</b> | <b>P-value</b> |
|-------------------------------------------------|----------------------------------------------|----------------------------|----------------|
| <b>Volume</b>                                   |                                              |                            |                |
| All calcified plaque, mm <sup>3</sup> (>350 HU) | 74.0 ± 99.5                                  | 106.5 ± 168.9              | 0.193          |
| Calcification 351-700 HU, mm <sup>3</sup>       | 56.3 ± 74.2                                  | 69.9 ± 108.2               | 0.454          |
| Calcification 701-1000 HU, mm <sup>3</sup>      | 14.5 ± 24.0                                  | 25.2 ± 49.5                | 0.112          |
| 1K Plaque (>1000 HU), mm <sup>3</sup>           | 3.6 ± 7.2                                    | 10.0 ± 23.6                | 0.011          |
| Data are provided as mean ± standard deviation  |                                              |                            |                |

**eTable 2.** Per-Patient Calcification Density Data for Age >75

|                                                                                           | <b>ACS*</b><br><b>N = 42</b> | <b>Control*</b><br><b>N = 42</b> | <b>P-value</b> |
|-------------------------------------------------------------------------------------------|------------------------------|----------------------------------|----------------|
| <b>Volume</b>                                                                             |                              |                                  |                |
| Total plaque volume                                                                       | 418.9 ± 410.7                | 327.3 ± 275.8                    | 0.474          |
| 1K Plaque (>1000 HU), mm <sup>3</sup>                                                     | 17.7 ± 25.8                  | 14.3 ± 25.8                      | 0.204          |
| Data are provided as mean ± standard deviation                                            |                              |                                  |                |
| *extra calcium density data could not be processed in 3 patients from the ICONIC registry |                              |                                  |                |

| <b>eTable 3. Lesion Specific Calcification Volumes for Culprit Precursors Versus Control Lesions</b> |                                                   |                                                                  |                                                   |
|------------------------------------------------------------------------------------------------------|---------------------------------------------------|------------------------------------------------------------------|---------------------------------------------------|
|                                                                                                      | <b>ACS patient; culprit precursor<br/>N = 93*</b> | <b>Control:<br/>Lesion with most severe stenosis<br/>N = 88†</b> | <b>P-value<br/>(control vs culprit precursor)</b> |
| Plaque volume, mm <sup>3</sup>                                                                       | 123.4 ± 124.1                                     | 109.3 ± 118.7                                                    | 0.200                                             |
| Lesion length, mm                                                                                    | 34.0 ± 19.7                                       | 31.7 ± 20.3                                                      | 0.195                                             |
| Diameter stenosis, %                                                                                 | 34.1 ± 16.9                                       | 39.4 ± 14.6                                                      | 0.059                                             |
| Max cross sectional plaque burden, %                                                                 | 59.7 ± 20.8                                       | 63.2 ± 20.7                                                      | 0.302                                             |
| <b>Calcification volume</b>                                                                          |                                                   |                                                                  |                                                   |
| Calcification 351-700 HU, mm <sup>3</sup>                                                            | 25.0 ± 30.4                                       | 28.6 ± 38.5                                                      | 0.737                                             |
| Calcification 701-1000 HU, mm <sup>3</sup>                                                           | 7.8 ± 13.8                                        | 13.9 ± 28.1                                                      | 0.161                                             |
| 1K plaque (>1000 HU), mm <sup>3</sup>                                                                | 2.6 ± 7.2                                         | 7.6 ± 20.3                                                       | 0.013                                             |
| Data are provided as mean ± standard deviation                                                       |                                                   |                                                                  |                                                   |
| *extra calcium density data could not be processed in 3 lesions                                      |                                                   |                                                                  |                                                   |
| † 5 patients did not have a non-totally occluded lesion                                              |                                                   |                                                                  |                                                   |

**eTable 4.** Lesion Specific Calcification Volumes for Culprit Precursors of Myocardial Infarction Versus Control Lesions

|                                            | <b>Myocardial infarction patient; culprit precursor<br/>N = 55</b> | <b>Control: Lesion with most severe stenosis<br/>N = 50†</b> | <b>P-value (control vs culprit precursor)</b> |
|--------------------------------------------|--------------------------------------------------------------------|--------------------------------------------------------------|-----------------------------------------------|
| Plaque volume, mm <sup>3</sup>             | 130 ± 137.1                                                        | 135.5 ± 137.7                                                | 0.851                                         |
| Lesion length, mm                          | 33.9 ± 20.2                                                        | 34.3 ± 21.4                                                  | 0.694                                         |
| Diameter stenosis, %                       | 32.5 ± 15.4                                                        | 40.0 ± 15.8                                                  | 0.049                                         |
| Max cross sectional plaque burden, %       | 58.1 ± 20.9                                                        | 63.1 ± 23.0                                                  | 0.269                                         |
| <b>Calcification volume</b>                |                                                                    |                                                              |                                               |
| Calcification 351-700 HU, mm <sup>3</sup>  | 25.6 ± 32.7                                                        | 38.7 ± 46.5                                                  | 0.664                                         |
| Calcification 701-1000 HU, mm <sup>3</sup> | 7.6 ± 13.6                                                         | 18.3 ± 33.4                                                  | 0.064                                         |
| 1K plaque (>1000 HU), mm <sup>3</sup>      | 2.0 ± 4.7                                                          | 9.2 ± 20.7                                                   | 0.023                                         |

Data are provided as mean ± standard deviation

† 5 patients did not have a non-totally occluded lesion

| <b>eTable 5. Plaque Composition in Individuals With a Large 1K Plaque Volume</b> |                                              |                           |                |
|----------------------------------------------------------------------------------|----------------------------------------------|---------------------------|----------------|
|                                                                                  | <b>Highest quartile 1K<br/>Plaque volume</b> | <b>Remaining patients</b> | <b>P-value</b> |
| Plaque volume, mm <sup>3</sup>                                                   | 539.6 ± 339.7                                | 206.9 ± 196.6             | <0.001         |
| % Calcified plaque                                                               | 48.3 ± 17.3                                  | 24.9 ± 21.0               | <0.001         |
| % Fibrous plaque                                                                 | 39.0 ± 10.3                                  | 50.2 ± 15.4               | <0.001         |
| % Fibro-fatty plaque                                                             | 11.4 ± 9.0                                   | 22.4 ± 17.9               | 0.017          |
| % Necrotic core plaque                                                           | 1.2 ± 2.7                                    | 2.5 ± 4.4                 | 0.050          |
| % Fibro-fatty + necrotic core                                                    | 12.6 ± 10.4                                  | 24.9 ± 20.6               | <0.001         |
| Data reported as mean ± standard deviation                                       |                                              |                           |                |
